# Supplementary material for: Matched pair analysis to evaluate weight loss during radiation therapy for head and neck cancer as a prognostic factor for survival
Source: PubMed Central journal article supplement — Ann Transl Med. 2021 May;9(10):914. doi: 10.21037/atm-20-4969 (PMC8184423; doi:10.21037/atm-20-4969), 2021-05
Supplement: atm-09-10-914-dss.pdf [file atm-09-10-914-dss.pdf]

## Data Sharing Statement

|                     |                                                                                                                                                    |                                                                                                                                                                                  |
|---------------------|----------------------------------------------------------------------------------------------------------------------------------------------------|----------------------------------------------------------------------------------------------------------------------------------------------------------------------------------|
| <b>Article Info</b> | <a href="http://dx.doi.org/10.21037/atm-20-4969">http://dx.doi.org/10.21037/atm-20-4969</a>                                                        |                                                                                                                                                                                  |
| <b>Item</b>         | <b>Question</b>                                                                                                                                    | <b>Authors' Response<br/>(place "-" if not applicable)</b>                                                                                                                       |
| 1                   | Would you like to share data collected for your study to others?                                                                                   | No                                                                                                                                                                               |
| 2                   | If not, would you like to share the reason for your decision?                                                                                      | This is a retrospective clinical study. The database is gathered from private patient information from Roswell Park Comprehensive Cancer Center; original data cannot be shared. |
| 3                   | What data in particular will be shared?                                                                                                            | -                                                                                                                                                                                |
| 4                   | Any other documents will be share? Such as study protocol, statistical analysis plan, informed consent form, clinical study report, analytic code. | No                                                                                                                                                                               |
| 5                   | When will data availability begin?                                                                                                                 | -                                                                                                                                                                                |
| 6                   | When will data availability end?                                                                                                                   | -                                                                                                                                                                                |
| 7                   | To whom will you share the data?                                                                                                                   | -                                                                                                                                                                                |
| 8                   | For what type of analysis or purpose?                                                                                                              | -                                                                                                                                                                                |
| 9                   | How or where can the data/documents be obtained?                                                                                                   | -                                                                                                                                                                                |
| 10                  | Any other restrictions?                                                                                                                            | None                                                                                                                                                                             |
